# 1 **Transcriptional profiling from whole embryos to single neuroblast lineages in *Drosophila***

2  
3 Austin Seroka\*, Sen-Lin Lai^, and Chris Q Doe^

4  
5 Howard Hughes Medical Institute, Institute of Neuroscience, University of Oregon, Eugene, OR  
6 97403 USA

7  
8 \*Current address: Fred Hutchinson Cancer Research Center, Seattle, WA

9  
10 ^corresponding authors: [cdoe@uoregon.edu](mailto:cdoe@uoregon.edu), [slai@uoregon.edu](mailto:slai@uoregon.edu)

11  
12 Key words: embryonic cell type, single cell RNAseq, neuroblast, GMC, temporal transcription  
13 factor, motor neuron, temporal identity, Nkx6, HGTX, Eve

## 14 15 **Abstract**

16 Embryonic development results in the production of distinct tissue types, and different cell types  
17 within each tissue. A major goal of developmental biology is to uncover the "parts list" of cell types  
18 that comprise each organ. Here we perform single cell RNA sequencing (scRNA-seq) of the  
19 *Drosophila* embryo to identify the genes that characterize different cell and tissue types during  
20 development. We assay three different timepoints, revealing a coordinated change in gene  
21 expression within each tissue. Interestingly, we find that the *elav* and *mhc* genes, whose protein  
22 products are widely used as markers for neurons and muscles, respectively, show broad pan-  
23 embryonic expression, indicating the importance of post-transcriptional regulation. We next focus  
24 on the central nervous system (CNS), where we identify genes characterizing each stage of  
25 neuronal differentiation: from neural progenitors, called neuroblasts, to their immediate progeny  
26 ganglion mother cells (GMCs), followed by new-born neurons, young neurons, and the most  
27 mature neurons. Finally, we ask whether the clonal progeny of a single neuroblast (NB7-1) share a  
28 similar transcriptional identity. Surprisingly, we find that clonal identity does not lead to  
29 transcriptional clustering, showing that neurons within a lineage are diverse, and that neurons with  
30 a similar transcriptional profile (e.g. motor neurons, glia) are distributed among multiple neuroblast  
31 lineages. Although each lineage consists of diverse progeny, we were able to identify a previously  
32 uncharacterized gene, *Fer3*, as an excellent marker for the NB7-1 lineage. Within the NB7-1  
33 lineage, transcriptional clusters are identifiable in neuroblasts and neurons, and each cluster is  
34 composed of current temporal transcription factor (e.g. Hunchback, Kruppel, Pdm, and Castor),  
35 novel temporal factors, and/or targets of the temporal transcription factors. In conclusion, we have  
36 characterized the embryonic transcriptome for all major tissue types and for three stages of  
37 development, as well as the first transcriptomic analysis of a single, identified neuroblast lineage,  
38 finding a lineage-enriched transcription factor.

39

## 40 **Background**

41 Understanding how tissues such as the nervous system develop is a central goal of developmental  
42 biology. An important part of development is the generation of cell types that vary in molecular  
43 profile, cell morphology and cell function. Identifying the different cell types in a tissue is  
44 particularly important for the study of neural development, where a vast number of distinct neurons  
45 must interconnect to form a functional nervous system (Luo, 2020). Defining neural diversity at the  
46 molecular level is important for generating a "parts list" of neurons in the brain, and will ultimately  
47 generate a better understanding of how neuronal diversity is established. Increased understanding  
48 of the transcriptional mechanisms used to generate the appropriate neurons in the correct spatial  
49 location and correct time also advances the potential for neurotherapeutics to counteract injury or  
50 disease.

51 Single cell RNA-sequencing (scRNA-seq) is a powerful method for determining the  
52 transcriptional profile of complex tissues such as the central nervous system (CNS), including  
53 mammalian cortical excitatory and inhibitory neurons (Shen et al., 2020), hippocampal neurons  
54 (Hodge et al., 2019), zebrafish embryonic neurons (Tambalo et al., 2020), and *Drosophila* larval,  
55 pupal and adult neurons (Brunet Avalos and Sprecher, 2021; Davie et al., 2018; Konstantinides et  
56 al., 2018; McLaughlin et al., 2021; Nguyen et al., 2021; Vicidomini et al., 2021; Xie et al., 2021)  
57 (Velten et al., 2022). Surprisingly, there has yet to be a sc-RNAseq study of *Drosophila* embryonic  
58 neurogenesis; the only embryonic sc-RNAseq study was tightly focused study on pre-gastrula  
59 embryos (Karaiskos et al., 2017).

60 *Drosophila* neurogenesis is ideal for the application of transcriptional analysis, as there is a  
61 wealth of cell- and tissue-specific genes that provide ground-truth information for identifying cell  
62 types through the use of sc-RNAseq. In the *Drosophila* embryo, neuronal diversity is generated in  
63 three steps: (1) spatial patterning cues are used to generate neural progenitor (neuroblast) identity,  
64 with each neuroblast having a unique identity based on its spatial location (Skeath and Thor,  
65 2003); (2) temporal patterning generated by a cascade of "temporal transcription factors" (TTFs;  
66 Hunchback > Kruppel > Pdm > Castor) diversifies ganglion mother cell (GMC) identity within each  
67 neuroblast lineage (Doe, 2017); and (3) nearly all GMCs undergo a terminal asymmetric division to  
68 partition the Notch inhibitor Numb into one of the two siblings, thereby creating Notch<sup>ON</sup> and  
69 Notch<sup>OFF</sup> siblings that have unique molecular and morphological identities (Mark et al., 2021;  
70 Skeath and Doe, 1998; Truman et al., 2010).

71 Here we present a scRNA-seq atlas of the entire embryo at three timepoints. We  
72 subsequently focus on gene expression changes within the developing nervous system: first at  
73 stage 12 when neuroblasts are maximally proliferative and only the earliest-born neurons have  
74 begun to differentiate; then at stage 14 when both neuroblasts and differentiated neurons are well  
75 represented; and finally at stage 16 where the bulk of the mature embryonic neurons are present.  
76 In addition to tracking the transcriptome of bulk neuroblasts, GMCs and neurons, we also address  
77 the question of whether sc-RNAseq can be used to identity lineage-specific gene expression.  
78 Here, we focus on the best characterized neuroblast lineage: NB7-1 which is a model for studying  
79 spatial patterning (McDonald et al., 1998), temporal patterning (Isshiki et al., 2001; Kohwi et al.,  
80 2013; Meng et al., 2019; Meng and Heckscher, 2020; Pearson and Doe, 2003; Seroka et al., 2020;  
81 Seroka and Doe, 2019), and Notch<sup>ON</sup>/Notch<sup>OFF</sup> sibling specification (Mark et al., 2021; Skeath and  
82 Doe, 1998). We can identify two classes of motor neurons and interneurons known to be present in  
83 this lineage, as well as novel gene expression patterns that identify candidates for lineage-specific  
84 functions. To our knowledge, our study is the first to characterize the Drosophila post-blastoderm  
85 embryonic transcriptome and the first to transcriptional profile a single neuroblast lineage.

86

## 87 **Results and Discussion**

88

### 89 **The transcriptome of all embryonic cell types**

90

91 To create a transcriptional time course of embryonic development, we dissociated stage 12, 14,  
92 and 16 embryos using standard methods and independently performed two technical replicates for  
93 10X Genomics scRNAseq on cells from each timepoint. From stage 12 embryos we isolated  
94 20,038 cells and obtained at 1,234 median genes per cell; from stage 14 embryos we isolated  
95 28,045 cells at 656 median genes per cell; and from stage 16 embryos we isolated 24,032 cells at  
96 450 median genes per cell. Cells were filtered for quality in Seurat using standard methods.  
97 Following quality control, the stage 12, 14 and 16 objects contained 17,564, 24,668 and 20,328  
98 cells respectively. We merged these datasets using Seurat to obtain a single UMAP atlas  
99 containing 62,560 cells and 96 clusters ([Figure 1A](#); [Supplemental Table 1](#)).

100

101

102

103

We observed clusters representing all expected embryonic cell types, identified by tissue-specific annotations in Flybase ([www.flybase.org](http://www.flybase.org)) and BDGP in situ atlas (<https://insitu.fruitfly.org/cgi-bin/ex/insitu.pl>) (Tomancak et al., 2007). For example, genes annotated as "glia" were used to score cells based on their expression as shown in [Figure 1E](#), and

104 the scores were used to assign the “glial” distribution in the UMAP object; a similar process was  
105 done for all tissue types. The UMAP for each annotated pool of genes is shown in [Figure 1B-Q](#),  
106 and the list of genes in each pool is given in [Supplemental Table 2](#).

107 Clusters included neural cell types in the central nervous system ([Figure 1B](#)), ciliated  
108 sensory neurons ([Figure 1C](#)), midline cells ([Figure 1D](#)), and glia ([Figure 1E](#)). These neural cell types  
109 will be further subdivided and characterized in more depth below.

110 We also observed clusters representing epithelia ([Figure 1F](#)); foregut ([Figure 1G](#)); midgut  
111 ([Figure 1H](#)); hindgut ([Figure 1I](#)); trachea ([Figure 1J](#)); somatic/visceral muscle ([Figure 1K,1L](#));  
112 hemocytes ([Figure 1M](#)); fatbody ([Figure 1N](#)); germline cells ([Figure 1O](#)); amnioserosa ([Figure 1P](#));  
113 and yolk ([Figure 1Q](#)). In addition to identifying all expected embryonic cell types, we also observe  
114 clusters that do not express tissue-specific genes (unknown, [Figure 1A](#)); these could be previously  
115 uncharacterized cell types or a mixture of cell types that were not well clustered. We conclude that  
116 we have identified transcriptional profiles for all major embryonic cell types.

117

## 118 **Tissue-specific proteins can be widely transcribed**

119

120 We were surprised to see widespread non-neural expression of the *embryonic lethal abnormal*  
121 *vision* (*elav*) gene, whose protein product Elav is widely used as a marker for post-mitotic neurons  
122 in *Drosophila* (Robinow and White, 1991) and vertebrates (Park et al., 2000). It has previously been  
123 noted that *elav* is transcribed in proliferating neuroblasts but not translated (Berger et al., 2007); we  
124 confirm here strong *elav* transcription in the neuroblast clusters ([Figure 2A](#)). Surprisingly, we also  
125 found *elav* broadly transcribed at lower levels in all tissue types of the embryo, including  
126 mesodermal derivatives, glia, trachea, gut, and fat body ([Figure 2A](#)). An *elav* paralog, *found in*  
127 *neurons* (*fne*), also shows the same pattern of high-level expression in neuronal clusters and  
128 broad, lower-level expression in all cell types ([Figure 2B](#)). This suggests that only post-mitotic  
129 neurons have a mechanism for translating the *elav* and *fne* transcripts. Similarly, the *C. elegans*  
130 single ortholog of Elav, named Exc-7, is also expressed in non-neuronal cell types including  
131 muscle and hypoderm (Pham and Hobert, 2019). In contrast, none of the zebrafish orthologs show  
132 noticeable transcription outside the CNS (Farnsworth et al., 2020).

133 To see if this mechanism could be generalized to another tissue, we examined several pan-  
134 mesodermal genes, and while most showed narrow expression in some or all mesodermal  
135 derivatives ([Figure 1C](#)), the *myosin heavy chain* (*mhc*) gene showed broad expression in all cell  
136 types ([Figure 2C](#)), even though Mhc protein is only detected in mesodermal lineages. We conclude

137 that some genes are transcribed widely followed by tissue-specific translation. Candidates for  
138 positive regulators of this process would be RNA-binding proteins or long non-coding RNAs  
139 enriched specifically in mesodermal derivatives (Supplemental Table 1). It will be of interest to  
140 understand the global mechanisms regulating mRNA translation that refine these broad expression  
141 pattern to unique cell types. We conclude that some tissue-specific or cell type-specific proteins  
142 are widely transcribed, revealing a major role for post-transcriptional regulation. It will be  
143 interesting to determine the mechanism of the post-transcriptional regulation either via RNA-  
144 binding proteins or microRNAs.

145

### 146 **Developmental timeline of all embryonic cell types**

147

148 In order to visualize the developmental trajectories of each identified cell type in the atlas, we  
149 plotted the timepoint of origin of each cell ([Figure 3](#)). We observe that unbiased clustering orders  
150 most cells of each identity along a maturation axis from stage 12 to stage 16. In some cases (CNS  
151 neuroblasts, germline cells, yolk) we observe less transcriptional differences over time, with cells  
152 from each timepoint clustering together instead of separating along a developmental axis. We  
153 draw three conclusions from these data: Firstly, most tissue types are established early in  
154 embryogenesis and change their transcriptional programs as they mature over time. Secondly, cell  
155 types such as CNS and glial progenitors continually produce progeny and show less variability  
156 along a developmental axis, as their core transcriptional identity as progenitors is maintained from  
157 stages 12-16. Thirdly, cells in the same tissues may develop synchronously, like fat body or  
158 hemocytes, so the cells at different developmental stages cluster together to form developmental  
159 trajectories. In contrast, the cells that develop asynchronously such CNS or epithelia do not cluster  
160 together during development. Lastly, some cell types such as germline and yolk cells are  
161 established early in development and their transcriptomes stay constant across time with almost  
162 no change ([Figure 3](#)).

163

### 164 **Neural cell type atlas**

165

166 We next wanted to characterize the neural transcriptomes in more detail, so we extracted the  
167 neuronal clusters (4, 13, 14, 22, 23, 25, 27, 28, 37, 39, 45, 47, 53, 59, 61, 67, 71, 73, 75, 85) from  
168 the merged all cells data set shown in [Figure 1A](#) and generated a new "embryonic neural cell type"  
169 atlas containing 13,136 cells distributed into 33 clusters ([Supplemental Table 3](#)). We then manually

170 assigned different CNS cell types (Figure 4) based on the following experimentally validated  
171 marker genes: neuroblasts, *miranda (mira)* (Figure 4B); GMCs, *tap* (Figure 4C); new-born Notch<sup>ON</sup>  
172 neurons, *Hey* (Figure 4D); young neurons, *neuronal synaptobrevin (nSyb)+ bruchpilot (brp)-* (Figure  
173 4E); mature neurons (or old neurons), *brp* (Figure 4F); midline cells, *single-minded (sim)* (Figure 4G);  
174 sensory neurons, *Root* (Figure 4H); glia, *reverse potential (repo)* (Figure 4I); and possibly enteric  
175 neurons, *Ecdysone-inducible gene E2 (ImpE2)* (Figure 4J). We conclude that our merged stage 12,  
176 14, and 16 atlas has representation from all major neural cell types.

177 We next narrowed our focus to the CNS only, and asked how the cell type-specific clusters  
178 changed over the three developmental stages analyzed here (stages 12, 14, 16). Stage 12 embryos  
179 are actively undergoing neuroblast divisions in this early stage of neurogenesis, while by stage 14  
180 neurogenesis and axon outgrowth are proceeding. By stage 16 neurons are actively involved in  
181 axon guidance, dendrite outgrowth, and synaptic connectivity (Goodman and Doe, 1993).  
182 Confirming previous work, we find that there is a general shift from expression of neuroblast  
183 markers to mature neuronal markers across these timepoints (Figure 5A; Table 1). For example, the  
184 neuroblast marker *miranda (mira)* is expressed in many cells at stage 12, but few at stage 16  
185 (Figure 5B; Table 1); conversely, the mature neuron marker *brp* is barely detected at stage 12  
186 (these may be pioneering motor neurons (Thomas et al., 1984)), but broadly expressed at stage 16  
187 (Figure 5F; Table 1). Genes characterizing other stages of neuronal development fall in between  
188 these extremes (Figure 5C-E; Table 1). We conclude that cell type specific clusters validated by  
189 ground truth experimental data for cluster defining genes will provide a rich resource for further  
190 identification and functional characterization that generate cell type-specific biology (e.g.  
191 neuroblast self-renewal or asymmetric division in the neuroblast cluster, or synaptogenic  
192 molecules in the mature neuron cluster). For cell types with few markers, such as GMCs or young  
193 neurons, our atlas provides the opportunity to identify additional cell type-defining genes.

|           | Stage 12<br>(2589 cells) | Stage 14<br>(3041 cells) | Stage 16<br>(2490 cells) |
|-----------|--------------------------|--------------------------|--------------------------|
| NB        | 18.7%                    | 12.2%                    | 8.5%                     |
| GMC       | 11.6%                    | 3.4%                     | 1.2%                     |
| Newborn N | 49.8%                    | 27.3%                    | 9.0%                     |
| Young N   | 18.0%                    | 39.6%                    | 10.2%                    |
| Old N     | 2%                       | 17.4%                    | 71.1%                    |

194

## 195 Neural cell type clustering of transcription factors and cell surface molecules

196

197 The most differentially expressed genes in the larval CNS and in other organisms are transcription  
198 factors (TFs) and cell surface molecules (CSMs) (Li et al., 2020). Here we characterize TFs  
199 expressed in the neuroblasts at each developmental timepoint (Figure 6A). We first used Seurat to  
200 identify the most enriched TFs at each stage, and then calculated the expression levels of TFs  
201 combined from stage 12, stage 14, and stage 16. We then used heatmap visualization to show the  
202 scaled average expression of each TF at different stages. We found that NBs express different TF  
203 subsets over time, but these subsets did not correlate with known temporal TF expression (*hb*,  
204 *pdm2*, or *cas*) (Figure 6A). This may be due to lineage asynchrony amongst the total NB  
205 population. Of course, it remains possible that different TFs are co-expressed with temporal TFs  
206 when examined at a single lineage level of resolution; we explore this possibility in the following  
207 section.

208 We next switched to analyzing the transcriptomes of undifferentiated cells (*hdc+*) and  
209 mature neurons (*brp+*) to understand the differences between immature and fully differentiated  
210 neurons (Figure 6B). We focused on TFs and cell surface molecules (CSMs), as these groups of  
211 genes are known to be highly differentially expressed in larval neurogenesis (Li et al., 2020). We  
212 found undifferentiated cells are enriched for Notch signaling pathway genes (*DI*, *Hey*, *E(spl)m7-*  
213 *HLH*, *E(spl)m8-HLH*, *E(spl)m $\beta$ -HLH*, and *N*), or neuroblast-related genes (*esg*, *l(3)neo38*, *run*, and  
214 *sna*). In contrast, mature neurons are enriched for TFs promoting cell fate (*ab*, *br*, *ct*, *dac*, *ftz-f1*,  
215 and *zfh2*), and CSMs for synapse formation (*beat llc*, *beat-VI*, *dpr6*, and *dpr8*,) and physiological  
216 functions (*nAChR $\alpha$ 1*, *nAChR $\alpha$ 5*, *nAChR $\alpha$ 6*, *Oct $\alpha$ 2R*). We conclude that Notch signaling is  
217 important in early neurogenesis, whereas some TFs and CSMs play a greater role in mature  
218 neurons. This is consistent with previous findings showing that Notch signaling is important for  
219 specifying sibling neurons following GMC division (Skeath and Doe, 1998).

220 As first shown in *C. elegans*, each neuron expresses a unique code of homeodomain TFs  
221 that correlate with, and in some cases specify, their identity (Reilly et al., 2020). Thus, we selected  
222 homeodomain TFs (HDTFs) previously shown to be expressed in motor neurons and interneurons,  
223 and looked for additional HDTFs that clustered with each of these well-defined neuronal types  
224 (Figure 6C). Interestingly, we found that ventral muscle motor neurons (*hb9+*, *islet+*, *Lim3+*, and  
225 *nkx6+*) express similar set of HDTFs, and they are not clustered with dorsal muscle motor neurons  
226 (*eve+*) or lateral muscle motor neurons (*B-H1+*). However, *hb9+*, *islet+*, *Lim3+*, and *nkx6+*  
227 interneurons do not cluster together like the motor neurons. Moreover, motor neurons and  
228 interneurons expressing *ap*, *B-H1*, *Dbx*, *eve*, *unc-4*, or *vvl* are clustered together, suggesting that  
229 these motor neurons are not very different from the interneurons. Furthermore, all motor neurons

230 and interneurons express more than one HDTF, suggesting that each neuron may express a  
231 unique set of HDTFs to specify their identity, similar to neurons in *C. elegans* (Reilly et al., 2020).

232 We next wanted to identify the CSMs that may be regulated by, and thus co-clustered with,  
233 motor neuron expressed HDTFs (Figure 6D). We focused on the CSMs reported in Özkan et al.  
234 (Özkan et al., 2013) and the phosphotyrosine kinases/phosphatases. First, we found motor  
235 neurons cluster with a similar set of CSMs, regardless of their muscle targets (Figure 6D). Despite  
236 this observation, ventral muscle motor neurons (*hb9+*, *islet+*, *Lim3+*, and *nkx6+*) remain clustered  
237 independently of the dorsal muscle MNs (*eve+*) and lateral muscle MNs (*B-H1+*) (Figure 6D). In  
238 addition, interneurons express similar set of CSMs, and cluster together distinctly from  
239 motoneurons, with the exception of *eve+* and *B-H1+* interneurons, which cluster away from other  
240 interneurons (Figure 6D). Secondly, different motor neurons and interneurons use different  
241 combination of CSMs (Figure 6D). It remains unclear if the activation of a CSM requires only one  
242 HDTF or a unique combination of HDTFs.

243

#### 244 **NB7-1 single lineage gene expression profiles across embryonic development**

245

246 To our knowledge, transcriptional profiling of an individual neuroblast lineage has not yet been  
247 performed. Here we identify the NB7-1 lineage by using NB7-1-gal4 to drive the expression of a  
248 RedStinger reporter, which is identifiable *in-silico* by subsetting cells expressing the RedStinger  
249 transcript (Figure 7A). We use this lineage-specific transcriptome to address these questions. (1)  
250 Do the cells in the NB7-1 lineage cluster together? (2) Can we identify lineage-specific genes, that  
251 could maintain the spatial identity of the NB throughout development? (3) Does NB7-1 undergo the  
252 same pattern of embryonic stage-specific differentiation? (4) Is it possible to detect genes co-  
253 clustered with the temporal TFs within a single NB lineage?

254 (1) Surprisingly, when unsupervised clustering was performed on all CNS cells, the NB7-1  
255 lineage did not cluster distinctly away from other lineages in UMAP space (Figure 7B). This  
256 indicates significant overlap in gene expression patterns between individual NBs.

257 (2) We were able to identify several genes enriched in NB7-1 (Figure 7C), including some  
258 known to be expressed in NB7-1, such as the tandem *engrailed (en)/invected (inv)* genes (Broadus  
259 et al., 1995), *gooseberry (gsb)* (Broadus et al., 1995) and *neuromancer 2* (Flybase: *mid*) (Leal et al.,  
260 2009). In addition, the top enriched gene was *Fer3*, a transcription factor that has not been  
261 previously characterized in the CNS. The *Fer3* RNA expression pattern shows a segmentally  
262 repeated cluster of cells adjacent to the midline consistent with expression in NB7-1



263 (<https://insitu.fruitfly.org/cgi-bin/ex/report.pl?ftype=3&ftext=LD04689-a>); [Figure 7D](#)). We use an endogenous *Fer3:GFP*  
264 transgene and found it overlaps with NB7-1-*gal4* UAS-RFP expression, thereby validating its  
265 expression in the NB7-1 lineage ([Figure 7E](#)).

266 (2) We then reclustered the 655 NB7-1 lineage cells (*RedStinger+*) from the whole CNS  
267 (8595 cells), and found that the NB7-1 lineage generates multiple cell types ([Figure 7F](#)). We also  
268 found that the NB7-1 lineage shows the same pattern of differentiation seen in the general CNS  
269 population ([Figure 7G](#); [Table 2](#)).

270 (3) We found genes that cluster with the temporal TFs *Hb*, *Kr*, *Pdm*, or *Cas*. The genes (*crol*,  
271 *eve*, *esg*, and *tef*) are expressed in a similar spatiotemporal pattern to *hb* and *pdm2* ([Figure 7H](#));  
272 *dbr*, *kn*, *Lmx1A*, and *wdn*, are expressed similarly to *Kr* ([Figure 7H](#)), and *CG44002* and *Poxn*  
273 similarly to *cas* ([Figure 7H](#)). We also found a gene module (*Ptx1* cluster, [Figure 7H](#)) which shows  
274 expression at later timepoints than *hb*, *Kr*, and *cas*; this module may include novel temporal TFs  
275 which function late in the lineage. Some of these are targets of temporal TFs in the NB7-1 lineage  
276 (e.g. *eve*; (Isshiki et al., 2001)), whereas others may be acting in parallel or after the known  
277 neuroblast temporal TFs. In any case, these co-clustered genes are excellent candidates for  
278 regulating neuronal identity in the NB7-1 lineage.

279

|           | Stage 12<br>(187 cells) | Stage 14<br>(229 cells) | Stage 16<br>(205 cells) |
|-----------|-------------------------|-------------------------|-------------------------|
| NB        | 25.1%                   | 13.1%                   | 7.3%                    |
| GMC       | 15.0%                   | 9.7%                    | 5.4%                    |
| Newborn N | 21.4%                   | 10.0%                   | 2.9%                    |
| Young N   | 38.0%                   | 60.3%                   | 30.7%                   |
| Old N     | 0.5%                    | 7.0%                    | 53.7%                   |

280

## 281 **Homeodomain transcription factors and cell surface molecules are upregulated from** 282 **progenitors to neurons in the NB7-1 lineage**

283

284 We have shown earlier that homeodomain TFs and CSMs are differentially expressed in post-  
285 mitotic motor neurons and interneurons. It remains unclear if these molecules, essential for neuron  
286 fate specification and morphogenesis, are inherited from progenitor cells or synthesized de-novo  
287 in post-mitotic neurons. Here we use the NB7-1 lineage to address this concept. We computed  
288 the average expression of all homeodomain TFs and selected CSMs (see [Figure 6](#)) in the NB7-1  
289 lineage. We found that some homeodomain TFs may initially be expressed in NBs; these include

290 spatial factors (*gsb*) or neuroblast self-renewal factors (*pros*). Some homeodomain TFs are  
291 modestly expressed in neuroblasts, but upregulated in newborn neurons (*ems*, *pdm2*, and *repo*).  
292 Some are highly expressed in young neurons (*acj6*, *caup*, *Dbx*, *eve*, and *scro*), while some  
293 homeodomain TFs only expressed at significant levels in mature neurons (*CG4328*, *Dfd*, and  
294 *Nk7.1*) (Figure 7I, Supplemental Figure 1). Most of these CSMs are required for neuron pathfinding  
295 and synapse formation, where expression is generally restricted to mature neurons. Interestingly,  
296 some CSMs, especially that play a role in axon guidance, show early enrichment in neuroblasts  
297 (*Fas3*, *Sema1a*, *Ten-a*, and *robo2*) (Figure 7J, Supplemental Figure 1); their function in progenitors  
298 remains unknown. In conclusion, we found several homeodomain TFs and CSMs with known roles  
299 in neuronal fate determination and morphogenesis to be enriched in the NB7-1 lineage as early as  
300 in neuroblasts.

301

## 302 **Methods**

303

### 304 Fly Stocks

305 Male and female *Drosophila melanogaster* were used. The chromosomes and insertion sites of  
306 transgenes (if known) are shown next to genotypes. Previously published *gal4* lines, mutants and  
307 reporters used were: *NB7-1-gal4<sup>KZ</sup>* (II) (Seroka and Doe, 2019), called *NB7-1-gal4* here; *UAS-*  
308 *RedStinger* [RRID:BDSC\_8547]; *UAS-mCD8:RFP* [RRID:BDSC\_32218]; and *Fer3-*  
309 *GFP.FPTB* [RRID:BDSC\_66447].

310

### 311 Immunostaining and imaging

312 DyLight 488-conjugated goat anti-GFP antibody was used (Novus Biologicals, Centennial, CO).  
313 Embryos were fixed and stained as previously described (Seroka and Doe, 2019). The samples  
314 were mounted in Vectashield (Vector Laboratories, Burlingame, CA). Images were captured with a  
315 Zeiss LSM 900 confocal microscope with a z-resolution of 0.5  $\mu\text{m}$ . Images were processed using  
316 the open-source software FIJI. Figures were assembled in Adobe Illustrator (Adobe, San Jose,  
317 CA).

318

### 319 Embryo dissociation

320 Cell dissociates were prepared from 8-9 hr (stage 12), 10-11 hr (stage 14) and 15-16 hr (stage 16)  
321 embryos respectively. Embryos were washed in DI water, before surface sterilization in 100%  
322 bleach for 5 minutes. Embryos were homogenized in Chan-Gehring (C+G) media by six to eight

323 strokes of a loose-fitting dounce. The cell suspension was filtered through a 40  $\mu$ m Nitex mesh,  
324 and cells were pelleted in a clinical centrifuge at 4°C (setting 5, IEC). The cell pellet was washed  
325 twice by pouring off the supernatant and gently triturating the pellet in fresh C+G. Percent cell-  
326 survival was determined for each dissociate by BioRad TC-20 trypan-blue assay.

327

### 328 Generating raw data

329 Sample preparation was performed by the University of Oregon Genomics and Cell  
330 Characterization core facility (<https://gc3f.uoregon.edu/>) Dissociated cells were run on a 10X  
331 Chromium platform using 10X V2 chemistry targeting 10,000 cells per sample. Following cDNA  
332 library preparation, the library for each timepoint was amplified with 15 cycles of PCR before  
333 sequencing on two separate Illumina Hi-seq lanes, providing two technical replicates for each  
334 timepoint (stages 12, 14, 16). Replicates were merged using the CellRanger Aggregate function  
335 prior to quality control and downstream analysis. Reads were aligned to the Drosophila genome  
336 (BDGP6.22) and protein coding reads were counted. The resulting sequencing data were analyzed  
337 using the 10X CellRanger pipeline, version 3.1.0 (Zheng et al., 2017) and the Seurat software  
338 package for R, v3.1.2 using standard quality control, normalization, and analysis steps. Cells were  
339 filtered by % expression of mitochondrial genes, indicating high stress state. Only cells expressing  
340 <20% mitochondrial reads were retained for analysis. Additionally, cells containing reads for <50  
341 and >3000 unique genes were filtered out of downstream analysis. For each gene, expression  
342 levels were normalized by total expression, multiplied by a scale factor (10,000) and log-  
343 transformed. Differential expression analysis was performed with the FindAllMarkers function in  
344 Seurat using Wilcoxon rank sum test. Tissue identity was determined by the expression score of  
345 tissue-specific genes ([Supplemental Table 2](#)) with the AddModuleScore function in Seurat. Cells  
346 were subsetted for further analysis based on the clustering and expression of ground-truth genes  
347 (see Results sections).

348

### 349 **Abbreviations**

350 Single cell RNA sequencing (sc-RNAseq), Even-skipped (Eve); Temporal transcription factor (TTF);  
351 Hunchback (Hb); Kruppel (Kr); Nubbin/Pou domain 2 (Pdm), Castor (Cas); NB7-1 split gal4 (NB7-1-  
352 gal4); central nervous system (CNS).

353

### 354 **Ethical Approval and Consent to participate**

355 Not applicable; no vertebrate or human subjects.

356

### 357 **Consent for publication**

358 All authors have approved this manuscript.

359

### 360 **Availability of data and materials**

361 All code used for analysis will be uploaded to GitHub upon acceptance. No new fly stocks were  
362 generated, and all fly stocks are available from public stock centers or by request.

363

### 364 **Competing interests**

365 The authors declare no competing interests.

366

### 367 **Funding**

368 This work was funded by HHMI (S-LL,CQD), NIH R01 HD27056 (CQD), and T32 HD007348 (AQS).

369

### 370 **Author contributions**

371 A.Q.S., S.-L.L and C.Q.D. conceptualized the work. A.Q.S. and S.-L.L. performed experiments  
372 and analyzed results. All authors contributed to writing the manuscript.

373

### 374 **Acknowledgements**

375 We thank Noah Dillon and Dylan Farnsworth for comments on the manuscript. We thank Maggie  
376 Weitzman in the Genomics Core for library preparation and sequencing.

377

### 378 **Authors information**

379 Howard Hughes Medical Institute, Institute of Neuroscience, University of Oregon, Eugene 97403,  
380 USA.

381

### 382 **Figure 1. Tissue type atlas of whole *Drosophila* embryo**

383 (A) Integrated single-cell atlas of whole *Drosophila* embryos. Cluster identity is determined by the  
384 module scores based on the tissue-specific genes.

385 (B-Q) Plots of module scores of tissue-specific genes for each individual tissue in UMAP space.  
386 The colors encode the module scores computed by AddModuleScore function in Seurat. Tissue  
387 defining genes listed in Supplemental Table 2.

388

### 389 **Figure 2. Tissue-specific proteins can be widely transcribed**

390 (A) Plot of *elav* expression level in whole embryo single-cell atlas.

391 (B) Plot of *fne* expression level in whole embryo single-cell atlas.  
392 (C) Plot of *mhc* expression level in whole embryo single-cell atlas.

393

### 394 **Figure 3. Developmental trajectory of all embryonic cells**

395 Plot of integrated single cell atlas based on their developmental stages in UMAP space. Stage 12,  
396 magenta; stage 14, green; stage 16, blue.

397

### 398 **Figure 4. Atlas of reclustered embryonic nervous system**

399 (A) Integrated single-cell atlas of *Drosophila* embryonic nervous system. Cluster identity is  
400 determined by the expression ground-truth genes as indicated.

401 (B-J) Plots of expression level of ground-truth genes for each individual neural cell type in UMAP  
402 space. Colors encode logarithm-transformed expression levels.

403

### 404 **Figure 5. Neural cell type atlas**

405 (A) Atlas of neural cells at embryonic stage 12, stage 14, and stage 16. NB, neuroblast; GMC,  
406 ganglion mother cell; newborn N, newborn neuron; young N, young neuron; old N, mature neuron.

407 (B-F) Distribution of ground-truth genes in the neural cell UMAP at embryonic stage 12, stage 14,  
408 and stage 16. Colors encode logarithm-transformed expression levels.

409

### 410 **Figure 6. Gene expression profiles in neuroblasts and neurons.**

411 (A) Heatmap of scaled average expression of pooled transcription factors statistically enriched in  
412 neuroblasts at stage 12 (S12), stage 14 (S14), and stage 16 (S16). Gene names are listed at the  
413 right side. Colors encode the levels of scaled average expression of the transcription factors at  
414 different stages. Dendrogram at the left shows the clustering of the transcription factors based on  
415 the levels of scaled average expression.

416 (B) Heatmap of statistically enriched transcription factors (TFs) and cell surface molecules (CSMs)  
417 in undifferentiated and mature neurons. Gene names are listed at the right side. The colors encode  
418 the logarithm-transformed folds of enrichment of average expression.

419 (C-D) Heatmap of homeodomain transcription factors (HDTFs) (C) and cell surface molecules  
420 (CSMs) (D) in selected motor neurons (MNs) and interneurons (INs). Gene names are listed at the  
421 right side. Colors encode the levels of average expression of HDTFs (C) and CMSs (D). Gene  
422 names are shown at the right side. Dendrogram at the top shows the clustering of different types  
423 of cells, and dendrogram at the left shows the clustering of HDTFs (C) or CSMs (D).

424

### 425 **Figure 7. Identification of NB7-1 lineage specific markers and candidate temporal 426 transcription factors.**

427 (A) NB7-1-gal4 drives the expression of RedStinger in the whole embryo; yellow outline shows the  
428 segmentally repeated NB7-1 lineage, whereas expression outside the outline are epidermal cells  
429 that are not part of the neural population.

430 (B) Distribution of NB7-1 lineage (*RedStinger+*) cells in the whole embryo CNS atlas.

431 (C) Heatmap of statistically enriched transcription factors in the NB7-1 lineage. Colors encode the  
432 logarithm-transformed folds of enrichment of average expression.

433 (D-E) Expression of Fer 3 mRNA (D) at stage 13 embryo (rotated from  
434 [https://insitu.fruitfly.org/insitu\\_image\\_storage/img\\_dir\\_118/insitu118808.jpe](https://insitu.fruitfly.org/insitu_image_storage/img_dir_118/insitu118808.jpe) ) and  
435 GFP-tagged Fer3 (E). Fer3 (E, top panel) and NB7-1-gal4 driven expression of membrane-bound  
436 RFP (E, middle panel) overlaps in NB7-1 lineage (E, bottom panel).  
437 (F) UMAP of reclustered NB7-1 lineage cells.  
438 (G) UMAP of NB7-1 neural cells at stage 12, stage 14, and stage 16. NB, neuroblast; GMC,  
439 ganglion mother cell; N, neuron.  
440 (H) Scaled average expression of transcription factors in neuroblasts (NB), newborn and young  
441 neuron (newborn & young N), and mature neuron (old N) at stage 12, stage 14, and stage 16. Color  
442 encodes the levels of scaled average expression of each transcription factor at different stages.  
443 The bottom panels show the magnified branches of cluster tree clustered with known temporal  
444 identify factors (*hb*, *Kr*, *pdm2*, and *cas*), and *Ptx1*, and each cluster is bordered by the vertical  
445 black lines. Gene names are listed at the bottom.  
446 (I-J) Heatmap of average expression of homeodomain transcription factors (HDTFs) and cell  
447 surface molecules (CSMs) in NB7-1 neuroblast (NB), GMC (ganglion mother cells), newborn  
448 neurons (newborn N), young neurons (young N) and mature neurons (old N). Gene names are  
449 shown at the bottom. Dendrogram at the top shows the clustering of HDTFs (I) and CSMs (J).  
450 Colors encode the levels of average expression.

451

452 **Supplemental Table 1. Genes enriched in each embryonic tissue cluster in Figure 1.**

453 A spreadsheet of markers of each individual cluster determined by FindAllMarkers function in  
454 Seurat. Identity of each cluster is determined by tissue-specific genes ([Supplemental Table 2](#)).

455

456 **Supplemental Table 2. Genes used as tissue-specific "ground truth" in Figure 1.**

457 Sixteen separate sheets are included. Each sheet contains a list of genes that are annotated to be  
458 expressed in the tissue based on in situ hybridization database ([https://insitu.fruitfly.org/cgi-  
459 bin/ex/insitu.pl](https://insitu.fruitfly.org/cgi-bin/ex/insitu.pl)), and used to identify tissue-specific clusters in Figure 1.

460

461 **Supplemental Table 3. Genes enriched in each CNS tissue cluster.**

462 A spreadsheet of markers of each individual cluster determined by FindAllMarkers function in  
463 Seurat. Identity of each cluster is determined by ground-truth genes; see Figure 4.

464

465 **Supplemental Figure 1. Genes expressed in NB7-1 lineage.**

466 Atlas of NB7-1 lineage in UMAP and feature plots of genes expressed in NB7-1 lineage. Colors  
467 encode the expression level.

468

469

## 470 References

- 471 Berger, C., Renner, S., Lüer, K., Technau, G.M., 2007. The commonly used marker ELAV is  
472 transiently expressed in neuroblasts and glial cells in the Drosophila embryonic CNS. *Dev.*  
473 *Dyn. Off. Publ. Am. Assoc. Anat.* 236, 3562–3568. <https://doi.org/10.1002/dvdy.21372>
- 474 Broadus, J., Skeath, J.B., Spana, E.P., Bossing, T., Technau, G., Doe, C.Q., 1995. New neuroblast  
475 markers and the origin of the aCC/pCC neurons in the Drosophila central nervous system.  
476 *Mech Dev* 53, 393–402. <https://doi.org/0925477395004548> [pii]
- 477 Brunet Avalos, C., Sprecher, S.G., 2021. Single-Cell Transcriptomic Reveals Dual and Multi-  
478 Transmitter Use in Neurons Across Metazoans. *Front. Mol. Neurosci.* 14, 623148.  
479 <https://doi.org/10.3389/fnmol.2021.623148>
- 480 Davie, K., Janssens, J., Koldere, D., De Waegeneer, M., Pech, U., Kreft, Ł., Aibar, S., Makhzami,  
481 S., Christiaens, V., Bravo González-Blas, C., Poovathingal, S., Hulselmans, G., Spanier,  
482 K.I., Moerman, T., Vanspauwen, B., Geurs, S., Voet, T., Lammertyn, J., Thienpont, B., Liu,  
483 S., Konstantinides, N., Fiers, M., Verstreken, P., Aerts, S., 2018. A Single-Cell  
484 Transcriptome Atlas of the Aging Drosophila Brain. *Cell* 174, 982–998.e20.  
485 <https://doi.org/10.1016/j.cell.2018.05.057>
- 486 Doe, C.Q., 2017. Temporal Patterning in the Drosophila CNS. *Annu Rev Cell Dev Biol* 33, in press.
- 487 Farnsworth, D.R., Saunders, L.M., Miller, A.C., 2020. A single-cell transcriptome atlas for zebrafish  
488 development. *Dev. Biol.* 459, 100–108. <https://doi.org/10.1016/j.ydbio.2019.11.008>
- 489 Goodman, C.S., Doe, C.Q., 1993. Embryonic development of the Drosophila central nervous  
490 system, in: Bate, M., Martinez Arias, A. (Eds.), *The Development of Drosophila*  
491 *Melanogaster*. Cold Spring Harbor Press, Cold Spring Harbor, NY, pp. 1131–1207.
- 492 Hodge, R.D., Bakken, T.E., Miller, J.A., Smith, K.A., Barkan, E.R., Grayback, L.T., Close, J.L., Long,  
493 B., Johansen, N., Penn, O., Yao, Z., Eggermont, J., Höllt, T., Levi, B.P., Shehata, S.I.,  
494 Aevermann, B., Beller, A., Bertagnolli, D., Brouner, K., Casper, T., Cobbs, C., Dalley, R.,  
495 Dee, N., Ding, S.-L., Ellenbogen, R.G., Fong, O., Garren, E., Goldy, J., Gwinn, R.P.,  
496 Hirschstein, D., Keene, C.D., Keshk, M., Ko, A.L., Lathia, K., Mahfouz, A., Maltzer, Z.,  
497 McGraw, M., Nguyen, T.N., Nyhus, J., Ojemann, J.G., Oldre, A., Parry, S., Reynolds, S.,  
498 Rimorin, C., Shapovalova, N.V., Somasundaram, S., Szafer, A., Thomsen, E.R., Tieu, M.,  
499 Quon, G., Scheuermann, R.H., Yuste, R., Sunkin, S.M., Lelieveldt, B., Feng, D., Ng, L.,  
500 Bernard, A., Hawrylycz, M., Phillips, J.W., Tasic, B., Zeng, H., Jones, A.R., Koch, C., Lein,  
501 E.S., 2019. Conserved cell types with divergent features in human versus mouse cortex.  
502 *Nature* 573, 61–68. <https://doi.org/10.1038/s41586-019-1506-7>
- 503 Isshiki, T., Pearson, B., Holbrook, S., Doe, C.Q., 2001. Drosophila neuroblasts sequentially express  
504 transcription factors which specify the temporal identity of their neuronal progeny. *Cell* 106,  
505 511–21.
- 506 Karaiskos, N., Wahle, P., Alles, J., Boltengagen, A., Ayoub, S., Kipar, C., Kocks, C., Rajewsky, N.,  
507 Zinzen, R.P., 2017. The Drosophila embryo at single-cell transcriptome resolution. *Science*  
508 358, 194–199. <https://doi.org/10.1126/science.aan3235>
- 509 Kohwi, M., Lupton, J.R., Lai, S.L., Miller, M.R., Doe, C.Q., 2013. Developmentally regulated  
510 subnuclear genome reorganization restricts neural progenitor competence in Drosophila.  
511 *Cell* 152, 97–108. <https://doi.org/10.1016/j.cell.2012.11.049>
- 512 Konstantinides, N., Kapuralin, K., Fadil, C., Barboza, L., Satija, R., Desplan, C., 2018. Phenotypic  
513 Convergence: Distinct Transcription Factors Regulate Common Terminal Features. *Cell*  
514 174, 622–635.e13. <https://doi.org/10.1016/j.cell.2018.05.021>
- 515 Leal, S.M., Qian, L., Lacin, H., Bodmer, R., Skeath, J.B., 2009. *Neuromancer1* and *Neuromancer2*  
516 regulate cell fate specification in the developing embryonic CNS of Drosophila  
517 *melanogaster*. *Dev. Biol.* 325, 138–150. <https://doi.org/10.1016/j.ydbio.2008.10.006>

- 518 Li, H., Li, T., Horns, F., Li, J., Xie, Q., Xu, C., Wu, B., Kebschull, J.M., McLaughlin, C.N., Kolluru,  
519 S.S., Jones, R.C., Vacek, D., Xie, A., Luginbuhl, D.J., Quake, S.R., Luo, L., 2020. Single-Cell  
520 Transcriptomes Reveal Diverse Regulatory Strategies for Olfactory Receptor Expression  
521 and Axon Targeting. *Curr. Biol.* CB 30, 1189-1198.e5.  
522 <https://doi.org/10.1016/j.cub.2020.01.049>
- 523 Luo, L., 2020. Principles of Neurobiology, 2nd edition. ed. Garland Science, Boca Raton, FL.
- 524 Mark, B., Lai, S.-L., Zarin, A.A., Manning, L., Pollington, H.Q., Litwin-Kumar, A., Cardona, A.,  
525 Truman, J.W., Doe, C.Q., 2021. A developmental framework linking neurogenesis and  
526 circuit formation in the Drosophila CNS. *eLife* 10. <https://doi.org/10.7554/eLife.67510>
- 527 McDonald, J.A., Holbrook, S., Isshiki, T., Weiss, J., Doe, C.Q., Mellerick, D.M., 1998. Dorsoventral  
528 patterning in the Drosophila central nervous system: the vnd homeobox gene specifies  
529 ventral column identity. *Genes Dev* 12, 3603–12.
- 530 McLaughlin, C.N., Brbić, M., Xie, Q., Li, T., Horns, F., Kolluru, S.S., Kebschull, J.M., Vacek, D., Xie,  
531 A., Li, J., Jones, R.C., Leskovec, J., Quake, S.R., Luo, L., Li, H., 2021. Single-cell  
532 transcriptomes of developing and adult olfactory receptor neurons in Drosophila. *eLife* 10,  
533 e63856. <https://doi.org/10.7554/eLife.63856>
- 534 Meng, J.L., Heckscher, E.S., 2020. Development of motor circuits: From neuronal stem cells and  
535 neuronal diversity to motor circuit assembly. *Curr. Top. Dev. Biol.* in press.
- 536 Meng, J.L., Marshall, Z.D., Lobb-Rabe, M., Heckscher, E.S., 2019. How prolonged expression of  
537 Hunchback, a temporal transcription factor, re-wires locomotor circuits. *Elife* 8.  
538 <https://doi.org/10.7554/eLife.46089>
- 539 Nguyen, T.H., Vicidomini, R., Choudhury, S.D., Coon, S.L., Iben, J., Brody, T., Serpe, M., 2021.  
540 Single-Cell RNA Sequencing Analysis of the Drosophila Larval Ventral Cord. *Curr. Protoc.*  
541 1, e38. <https://doi.org/10.1002/cpz1.38>
- 542 Özkan, E., Carrillo, R.A., Eastman, C.L., Weiszmann, R., Waghray, D., Johnson, K.G., Zinn, K.,  
543 Celniker, S.E., Garcia, K.C., 2013. An extracellular interactome of immunoglobulin and LRR  
544 proteins reveals receptor-ligand networks. *Cell* 154, 228–239.  
545 <https://doi.org/10.1016/j.cell.2013.06.006>
- 546 Park, H.C., Hong, S.K., Kim, H.S., Kim, S.H., Yoon, E.J., Kim, C.H., Miki, N., Huh, T.L., 2000.  
547 Structural comparison of zebrafish Elav/Hu and their differential expressions during  
548 neurogenesis. *Neurosci. Lett.* 279, 81–84. [https://doi.org/10.1016/s0304-3940\(99\)00940-4](https://doi.org/10.1016/s0304-3940(99)00940-4)
- 549 Pearson, B.J., Doe, C.Q., 2003. Regulation of neuroblast competence in Drosophila. *Nature* 425,  
550 624–8. <https://doi.org/10.1038/nature01910> nature01910 [pii]
- 551 Pham, K., Hobert, O., 2019. Unlike Drosophila elav, the C. elegans elav orthologue exc-7 is not  
552 panneuronally expressed. *MicroPublication Biol.* 2019, 10.17912/micropub.biology.000189.  
553 <https://doi.org/10.17912/micropub.biology.000189>
- 554 Reilly, M.B., Cros, C., Varol, E., Yemini, E., Hobert, O., 2020. Unique homeobox codes delineate all  
555 the neuron classes of C. elegans. *Nature* 584, 595–601. <https://doi.org/10.1038/s41586-020-2618-9>
- 556
- 557 Robinow, S., White, K., 1991. Characterization and spatial distribution of the ELAV protein during  
558 Drosophila melanogaster development. *J Neurobiol* 22, 443–61.  
559 <https://doi.org/10.1002/neu.480220503>
- 560 Seroka, A., Yazejian, R.M., Lai, S.-L., Doe, C.Q., 2020. A novel temporal identity window generates  
561 alternating Eve+/Nkx6+ motor neuron subtypes in a single progenitor lineage. *Neural*  
562 *Develop.* 15, 9. <https://doi.org/10.1186/s13064-020-00146-6>
- 563 Seroka, A.Q., Doe, C.Q., 2019. The Hunchback temporal transcription factor determines motor  
564 neuron axon and dendrite targeting in Drosophila. *Development* 137.  
565 <https://doi.org/10.1242/dev.175570>



- 566 Shen, K., Zeppillo, T., Limon, A., 2020. Regional transcriptome analysis of AMPA and GABAA  
567 receptor subunit expression generates E/I signatures of the human brain. *Sci. Rep.* 10,  
568 11352. <https://doi.org/10.1038/s41598-020-68165-1>
- 569 Skeath, J.B., Doe, C.Q., 1998. Sanpodo and Notch act in opposition to Numb to distinguish sibling  
570 neuron fates in the *Drosophila* CNS. *Development* 125, 1857–65.
- 571 Skeath, J.B., Thor, S., 2003. Genetic control of *Drosophila* nerve cord development. *Curr Opin*  
572 *Neurobiol* 13, 8–15. <https://doi.org/S0959438803000072> [pii]
- 573 Tambalo, M., Mitter, R., Wilkinson, D.G., 2020. A single cell transcriptome atlas of the developing  
574 zebrafish hindbrain. *Dev. Camb. Engl.* 147, dev184143. <https://doi.org/10.1242/dev.184143>
- 575 Thomas, J.B., Bastiani, M.J., Bate, M., Goodman, C.S., 1984. From grasshopper to *Drosophila*: a  
576 common plan for neuronal development. *Nature* 310, 203–7.  
577 <https://doi.org/10.1038/310203a0>
- 578 Tomancak, P., Berman, B.P., Beaton, A., Weiszmam, R., Kwan, E., Hartenstein, V., Celniker, S.E.,  
579 Rubin, G.M., 2007. Global analysis of patterns of gene expression during  
580 *Drosophila* embryogenesis. *Genome Biol.* 8, R145. [https://doi.org/10.1186/gb-2007-8-7-](https://doi.org/10.1186/gb-2007-8-7-r145)  
581 [r145](https://doi.org/10.1186/gb-2007-8-7-r145)
- 582 Truman, J.W., Moats, W., Altman, J., Marin, E.C., Williams, D.W., 2010. Role of Notch signaling in  
583 establishing the hemilineages of secondary neurons in *Drosophila melanogaster*.  
584 *Development* 137, 53–61. <https://doi.org/10.1242/dev.041749>
- 585 Velten, J., Gao, X., Van Nierop Y Sanchez, P., Domsch, K., Agarwal, R., Bogner, L., Paulsen, M.,  
586 Velten, L., Lohmann, I., 2022. Single-cell RNA sequencing of motoneurons identifies  
587 regulators of synaptic wiring in *Drosophila* embryos. *Mol. Syst. Biol.* 18, e10255.  
588 <https://doi.org/10.15252/msb.202110255>
- 589 Vicidomini, R., Nguyen, T.H., Choudhury, S.D., Brody, T., Serpe, M., 2021. Assembly and  
590 Exploration of a Single Cell Atlas of the *Drosophila* Larval Ventral Cord. Identification of  
591 Rare Cell Types. *Curr. Protoc.* 1, e37. <https://doi.org/10.1002/cpz1.37>
- 592 Xie, Q., Brbic, M., Horns, F., Kolluru, S.S., Jones, R.C., Li, J., Reddy, A.R., Xie, A., Kohani, S., Li,  
593 Z., McLaughlin, C.N., Li, T., Xu, C., Vacek, D., Luginbuhl, D.J., Leskovec, J., Quake, S.R.,  
594 Luo, L., Li, H., 2021. Temporal evolution of single-cell transcriptomes of *Drosophila*  
595 olfactory projection neurons. *eLife* 10, e63450. <https://doi.org/10.7554/eLife.63450>
- 596 Zheng, G.X.Y., Terry, J.M., Belgrader, P., Ryvkin, P., Bent, Z.W., Wilson, R., Ziraldo, S.B., Wheeler,  
597 T.D., McDermott, G.P., Zhu, J., Gregory, M.T., Shuga, J., Montesclaros, L., Underwood,  
598 J.G., Masquelier, D.A., Nishimura, S.Y., Schnall-Levin, M., Wyatt, P.W., Hindson, C.M.,  
599 Bharadwaj, R., Wong, A., Ness, K.D., Beppu, L.W., Deeg, H.J., McFarland, C., Loeb, K.R.,  
600 Valente, W.J., Ericson, N.G., Stevens, E.A., Radich, J.P., Mikkelsen, T.S., Hindson, B.J.,  
601 Bielas, J.H., 2017. Massively parallel digital transcriptional profiling of single cells. *Nat.*  
602 *Commun.* 8, 14049. <https://doi.org/10.1038/ncomms14049>
- 603
- 604

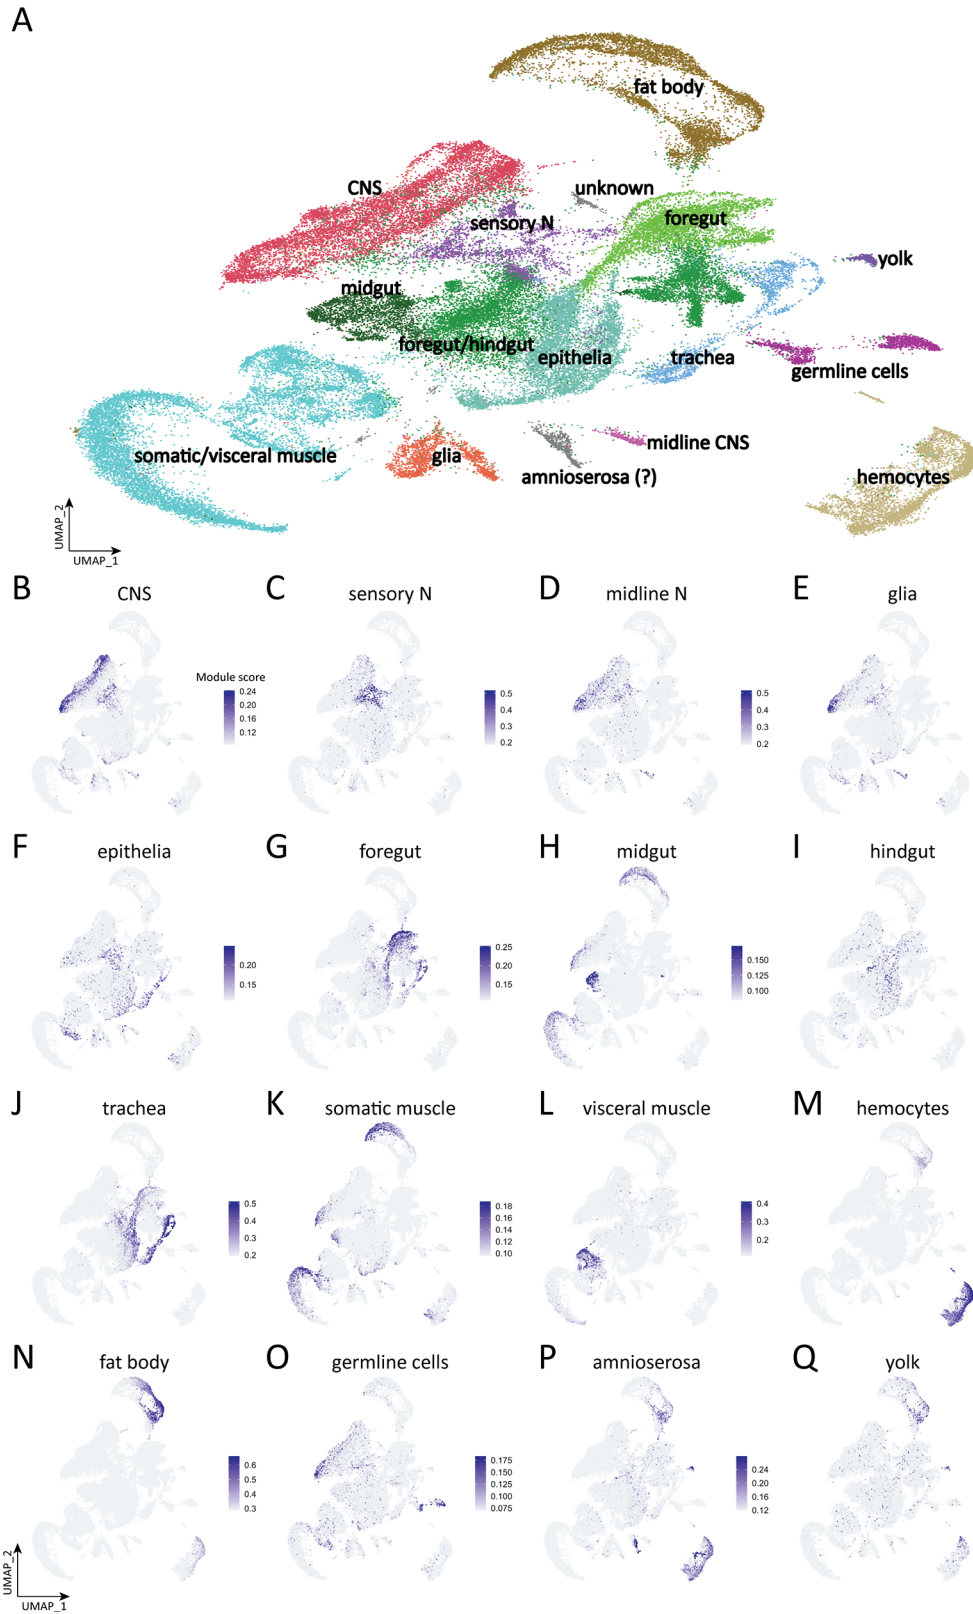

Figure 1

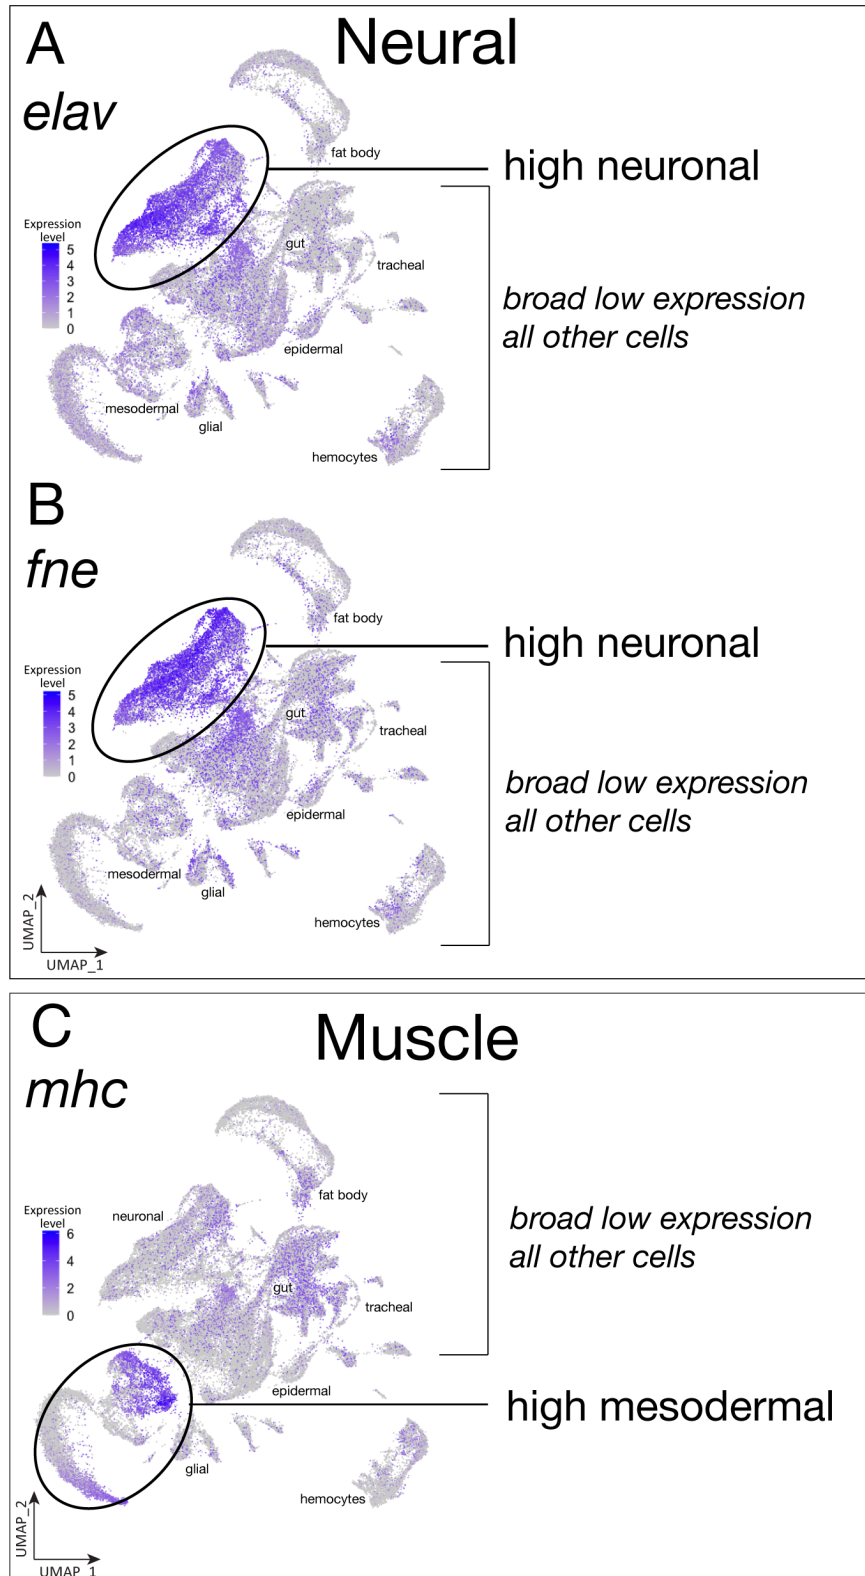

Figure 2

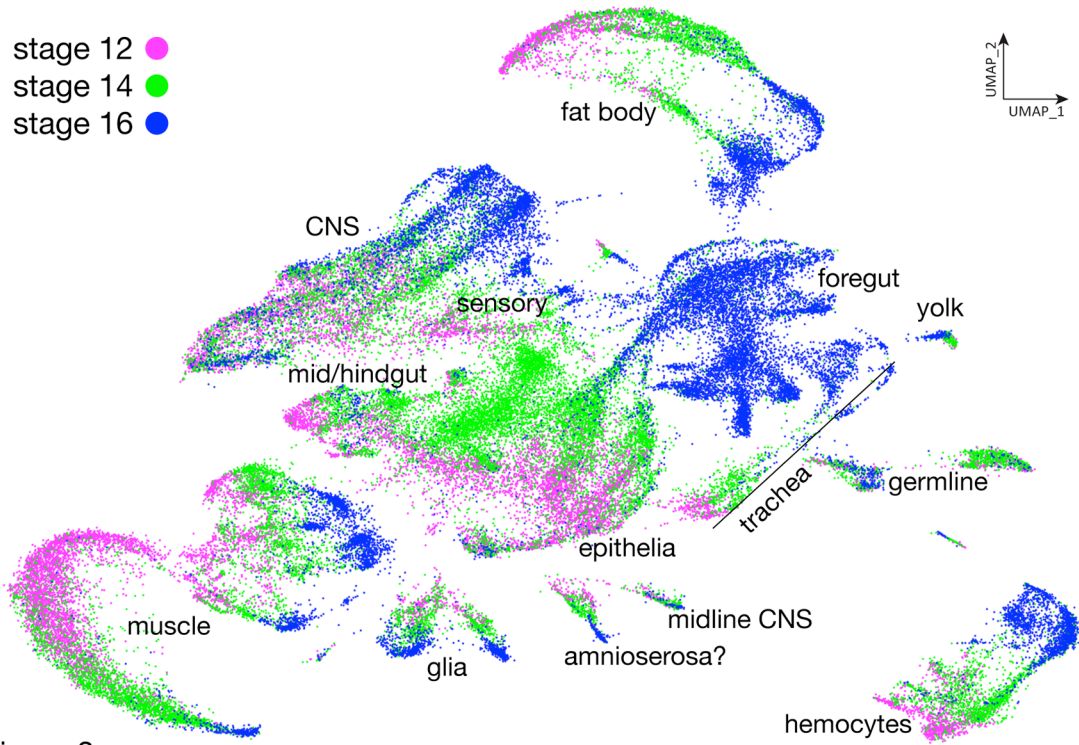

607

Figure 3

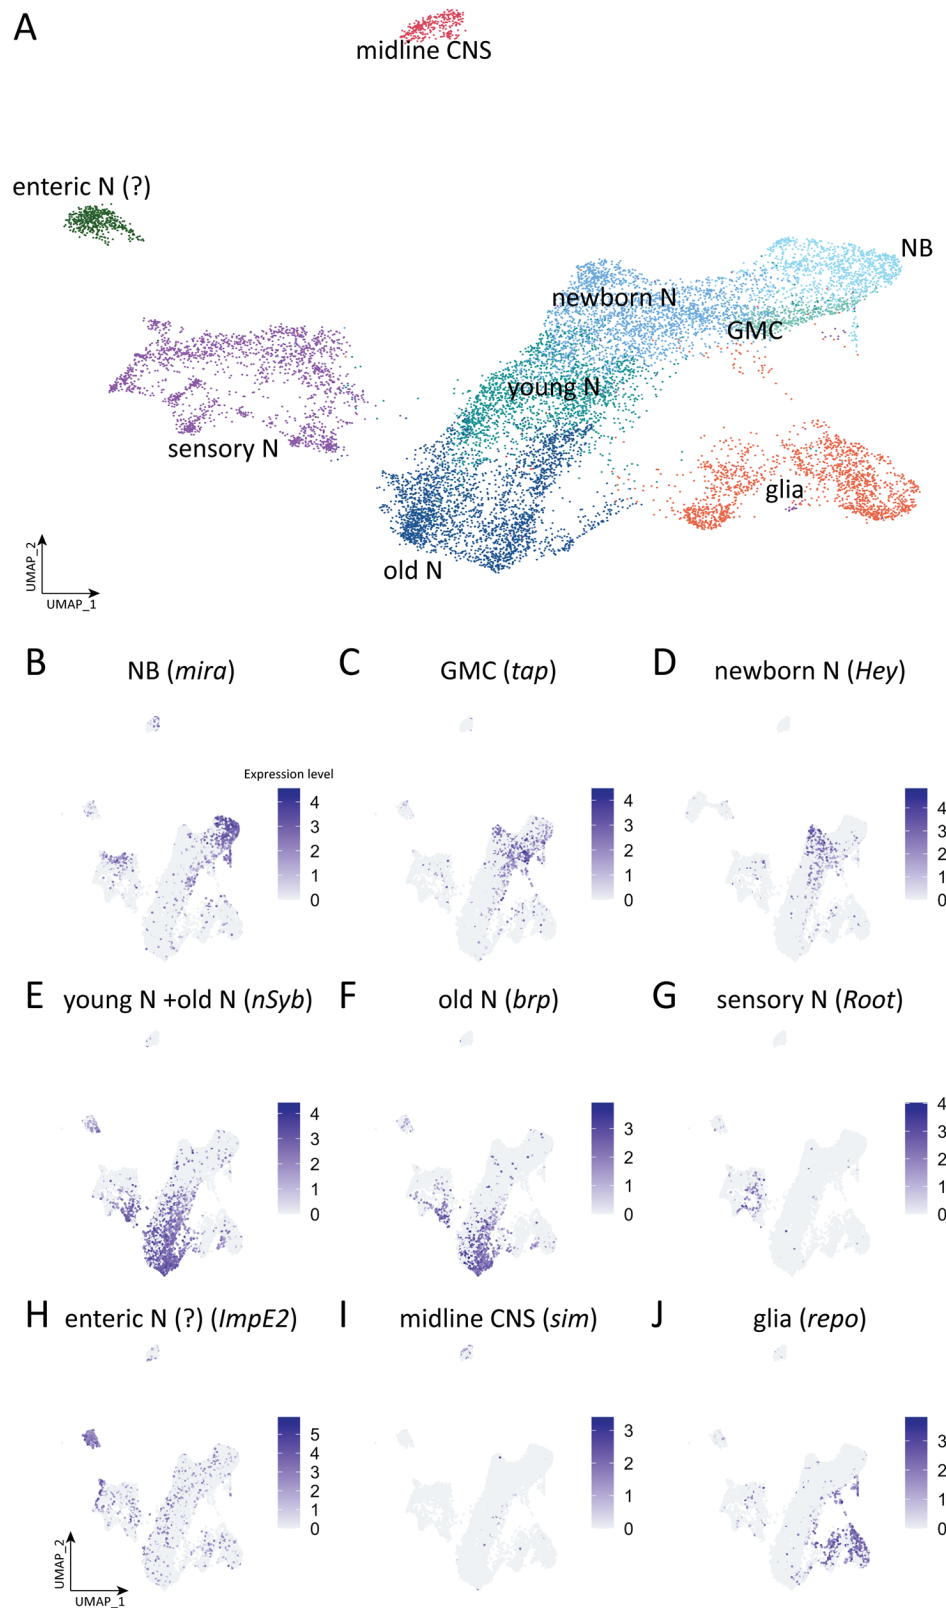

Figure 4

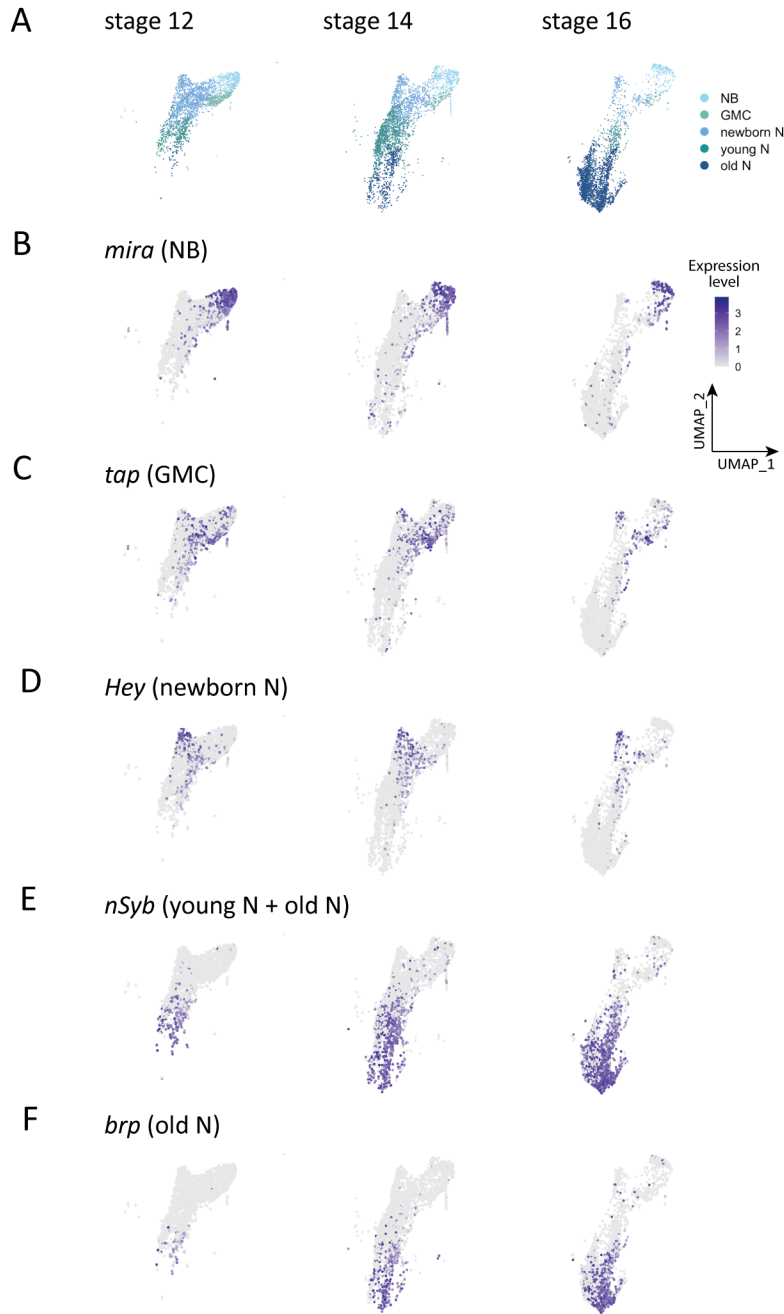

609 Figure 5

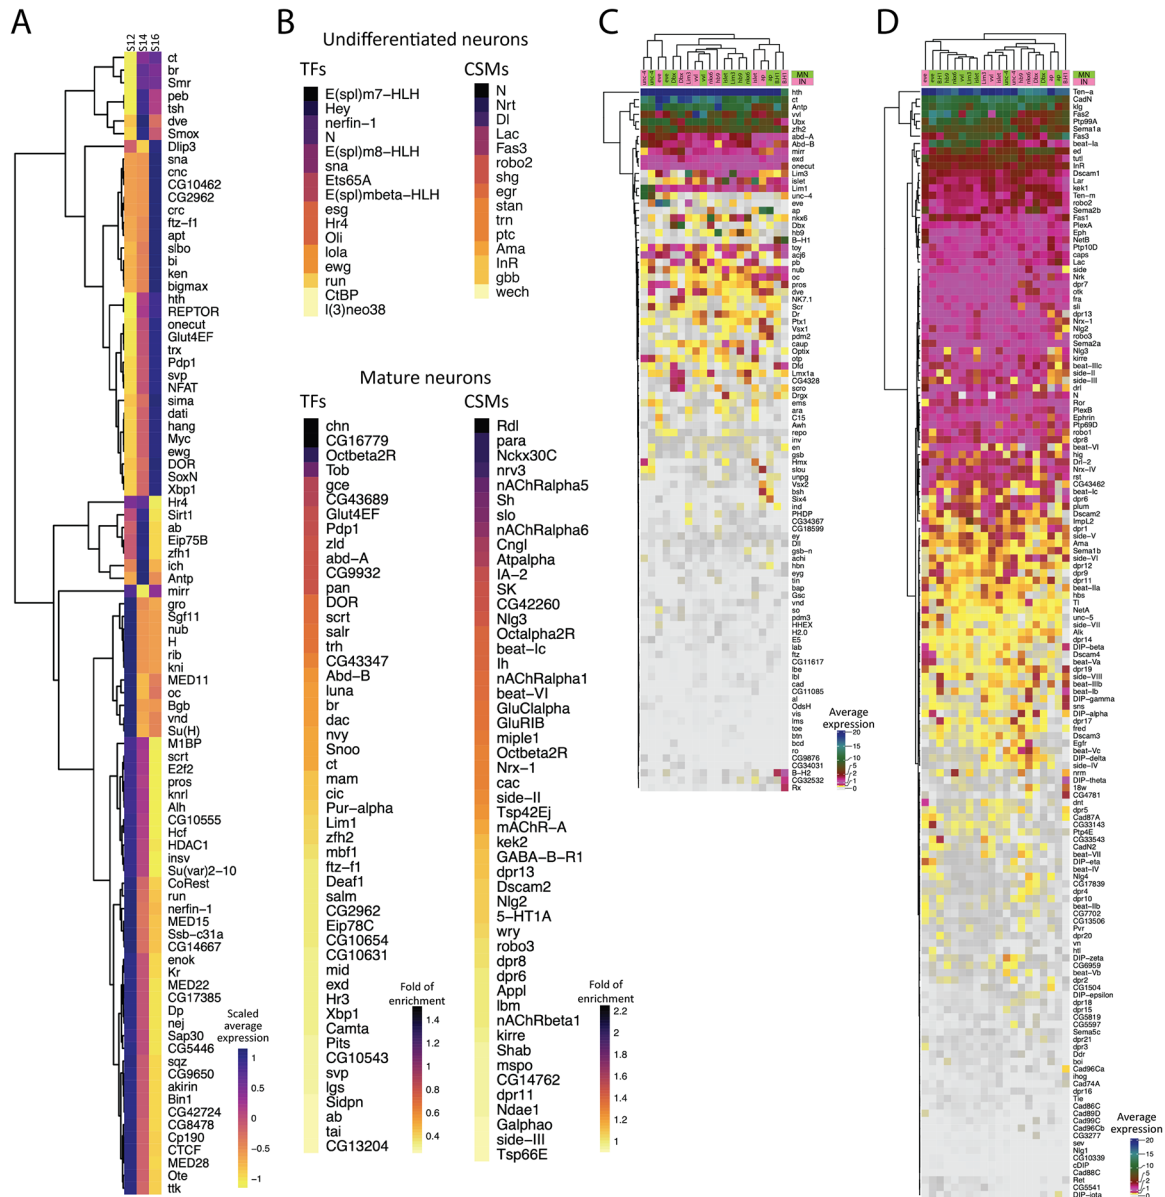

610

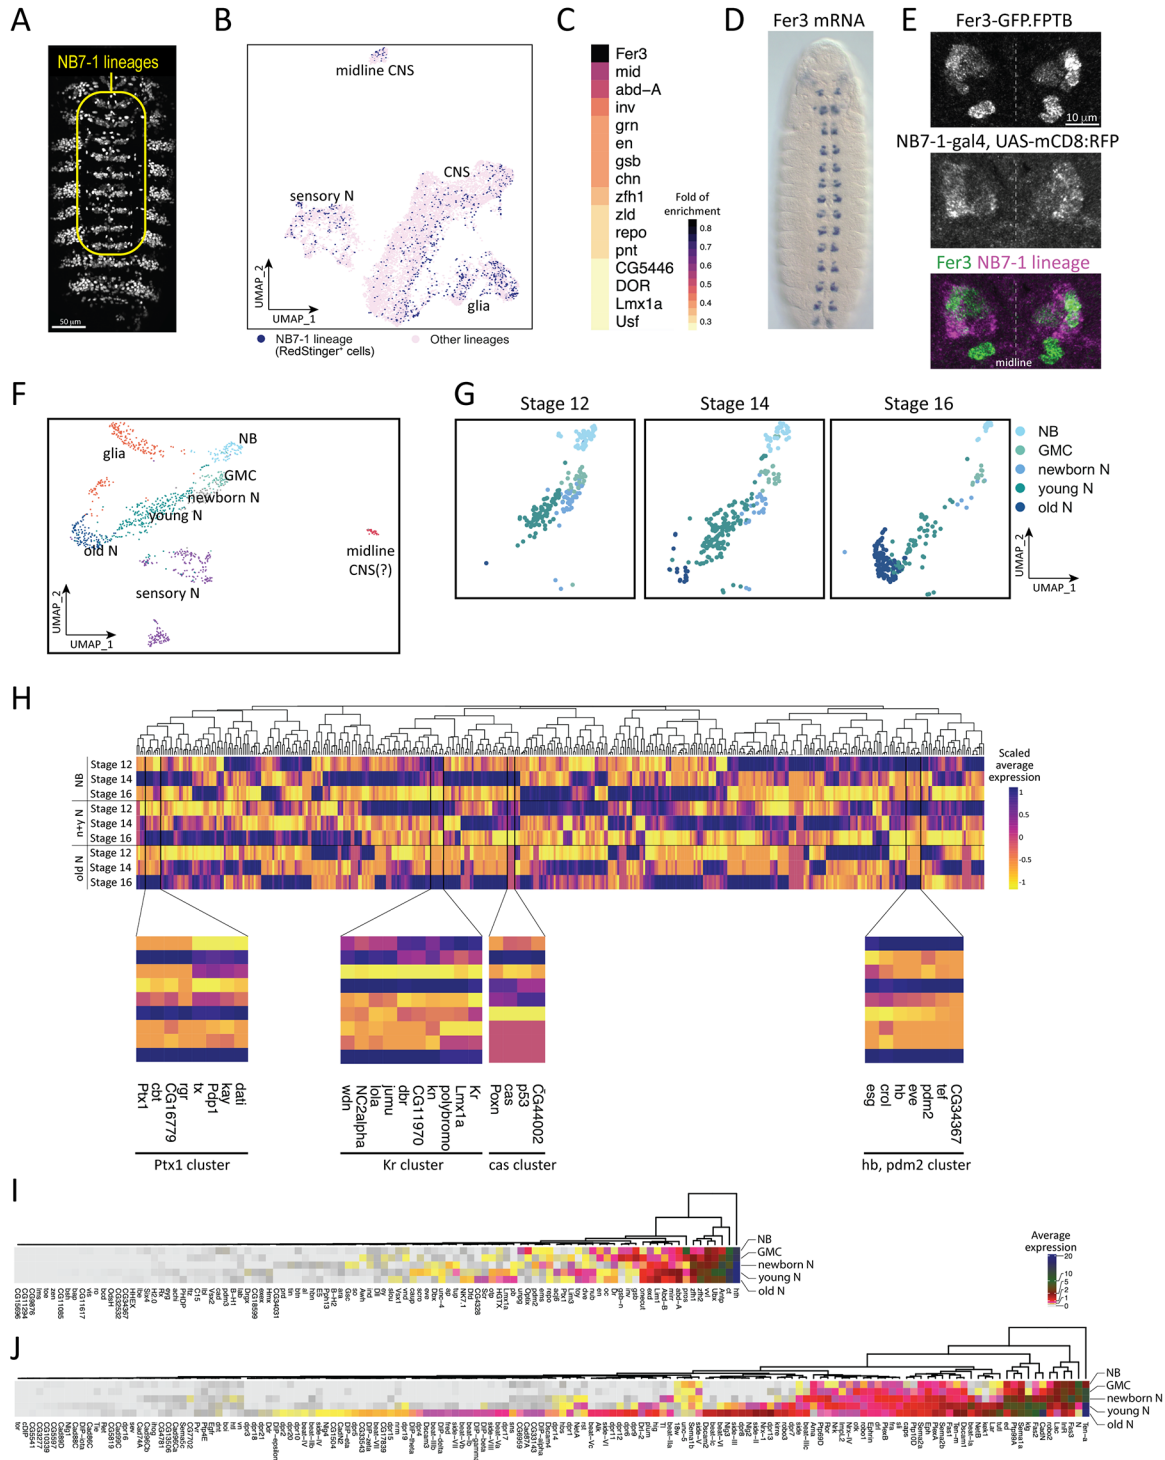

611 Figure 7



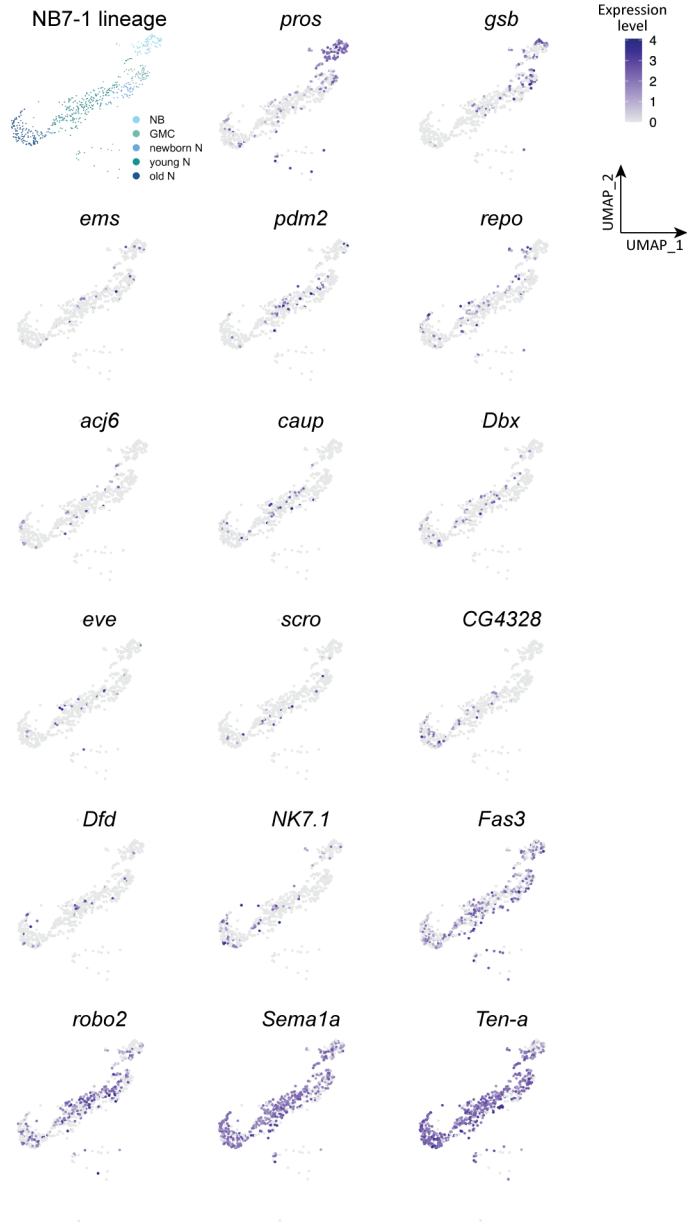

612

Supplemental Figure 1
